# Supplementary material for: Update of IGF-1 receptor inhibitor (ganitumab, dalotuzumab, cixutumumab, teprotumumab and figitumumab) effects on cancer therapy
Source: PubMed Central journal article supplement (PMC5438747; doi:10.18632/oncotarget.15704), 2017-02-25
Supplement: oncotarget-08-29501-s001.pdf [file oncotarget-08-29501-s001.pdf]

# Update of IGF-1 receptor inhibitor (Ganitumab, Dalotuzumab, Cixutumumab, Teprotumumab and Figitumumab) effects on cancer therapy

## Supplementary Material

**Supplement Table 1: Potential factors associated with any adverse events rate.**

| groups       | Poor tolerability group |      |      |      |      |      |      |      |      | Good tolerability group |      |      |      |      |      |      |      | Stat method | P     |
|--------------|-------------------------|------|------|------|------|------|------|------|------|-------------------------|------|------|------|------|------|------|------|-------------|-------|
|              | 1                       | 6    | 15   | 11   | 5    | 17   | 18   | 19   | 14   | 10                      | 20   | 13   | 7    | 16   | 4    | 3    | 2    |             |       |
| Study ID     | 1                       | 6    | 15   | 11   | 5    | 17   | 18   | 19   | 14   | 10                      | 20   | 13   | 7    | 16   | 4    | 3    | 2    |             |       |
| Any AES rate | 0.99                    | 0.99 | 0.99 | 0.98 | 0.98 | 0.98 | 0.98 | 0.98 | 0.96 | 0.96                    | 0.96 | 0.94 | 0.93 | 0.92 | 0.85 | 0.77 | 0.68 | t test*     | <0.05 |
| Cancer types | Bre                     | Pan  | Pro  | Pan  | Pan  | Ova  | Bre  | Lun  | Lun  | Col                     | Bre  | Lun  | Lun  | Col  | Pan  | Col  | Col  | Chi-Square# | 0.058 |
| Mono-mAbs    | Gan                     | Gan  | Fig  | Cix  | Gan  | Gan  | Fig  | Cix  | Cix  | Gan                     | Cix  | Fig  | Fig  | Gan  | Gan  | Dal  | Dal  | Chi-Square# | 0.414 |
| Regimen ID   | 1                       | 2    | 3    | 4    | 2    | 5    | 15   | 14   | 6    | 7                       | 16   | 8    | 9    | 10   | 2    | 11   | 11   | Chi-Square# | 0.144 |
| Patients NO. | 106                     | 160  | 97   | 57   | 315  | 88   | 115  | 52   | 48   | 46                      | 45   | 338  | 289  | 51   | 40   | 119  | 119  | t test*     | 0.312 |
| Median age   | 61                      | 62   | 68.9 | 63   | 62   | 58   | 61.2 | 64   | 60   | 62                      | 53   | 62   | 62   | 58   | 66   | LA   | LA   | t test*     | 0.093 |

**Supplement Table 2: Potential factors associated with Severe adverse events rate.**

| groups          | Poor tolerability group |      |      |      |      |      |     |      |      |      | Good tolerability group |      |      |      |      |      |      |      |      | Stat method | P           |       |
|-----------------|-------------------------|------|------|------|------|------|-----|------|------|------|-------------------------|------|------|------|------|------|------|------|------|-------------|-------------|-------|
|                 | 19                      | 13   | 14   | 5    | 15   | 7    | 11  | 6    | 4    | 16   | 2                       | 3    | 1    | 12   | 17   | 18   | 8    | 20   | 9    |             |             | 10    |
| Study ID        | 19                      | 13   | 14   | 5    | 15   | 7    | 11  | 6    | 4    | 16   | 2                       | 3    | 1    | 12   | 17   | 18   | 8    | 20   | 9    | 10          |             |       |
| Severe AES rate | 0.9                     | 0.83 | 0.75 | 0.68 | 0.66 | 0.63 | 0.6 | 0.59 | 0.58 | 0.55 | 0.5                     | 0.42 | 0.39 | 0.35 | 0.34 | 0.33 | 0.32 | 0.31 | 0.25 | 0.2         | t test*     | <0.05 |
| Cancer types    | Lun                     | Lun  | Lun  | Pan  | Pro  | Lun  | Pan | Pan  | Pan  | Col  | Col                     | Col  | Bre  | Lun  | Ova  | Bre  | Lun  | Bre  | Lun  | Col         | Chi-Square# | <0.05 |
| Mono-mAbs       | Cix                     | Fig  | Cix  | Gan  | Fig  | Fig  | Cix | Gan  | Gan  | Gan  | Dal                     | Dal  | Gan  | Dal  | Gan  | Fig  | Tep  | Cix  | Tep  | Gan         | Chi-Square# | 0.057 |
| Regimen ID      | 14                      | 8    | 6    | 2    | 3    | 9    | 4   | 2    | 2    | 10   | 11                      | 11   | 1    | 12   | 5    | 15   | 13   | 16   | 13   | 7           | Chi-Square# | <0.05 |
| Patients NO.    | 52                      | 338  | 48   | 315  | 97   | 289  | 57  | 160  | 40   | 51   | 119                     | 119  | 106  | 37   | 88   | 115  | 57   | 45   | 57   | 46          | t test*     | 0.608 |
| Median age      | 64                      | 62   | 60   | 62   | 68.9 | 62   | 63  | 62   | 66   | 58   | LA                      | LA   | 61   | 62   | 58   | 61.2 | 63   | 53   | 62   | 62          | t test*     | 0.826 |
